# Supplementary material for: Trace-doped metal–organic gels with remarkably enhanced luminescence
Source: Royal Society of Chemistry journal article supplement (doi:10.1039/c7ra05783k), 2017-01-01
Supplement: c7ra05783k1.pdf [file c7ra05783k1.pdf]

## Supplementary Information

### **Trace-doped metal-organic gels with remarkably enhanced luminescence**

*Xiying Feng, Lihua Zeng, Dianting Zou, Zizhe Zhang, Guihao Zhong, Shuyin Peng, Liping Liu, Liuping Chen, and Jianyong Zhang\**

Sun Yat-Sen University, Lehn Institute of Functional Materials, MOE Laboratory of Bioinorganic and Synthetic Chemistry, Guangzhou 510275, China. Email: zhjyong@mail.sysu.edu.cn

#### **Experimental section**

**Materials and methods.** All reagents were analytical grade and used as received without further purification. Scanning electron microscopy (SEM) images were collected on a Hitachi SU8010 Ultra-high Resolution FE-SEM. Before measurement, the gel sample was dispersed in ethanol with the aid of sonication, put on silicon plate, and sputter coated with gold. Transmission electron microscopy (TEM) and energy dispersive X-ray spectroscopy (EDX) investigation were carried out on a FEI Tecnai G2 Spirit 120 kV transmission electron microscope with an energy dispersive X-ray spectrometer. The gel sample was dispersed in ethanol with the aid of sonication, and mounted on a carbon coated copper grid. X-ray diffraction investigations were carried out on a Rigaku Smart Lab diffractometer equipped with Cu K $\alpha$  radiation ( $\lambda =$

1.54056 Å). Thermogravimetric (TG) analyses were measured on a NETZSCH STA 449 F3 Jupiter instrument in a flowing nitrogen atmosphere with a 10 K min<sup>-1</sup>. N<sub>2</sub> adsorption measurements were performed using a Quantachrome Autosorb-IQ<sub>2</sub> analyzer. Before sorption measurements, the sample was degassed at 80°C for 16 h under high vacuum. Absorption measurements were carried out on a UV-2450 spectrophotometer. Photoluminescence measurements and time-resolved emission decay behaviours were recorded on an Edinburgh Instruments FLS980 combined lifetime and steady state fluorometer. Absolute photoluminescence quantum yields were determined on a Hamamatsu C9920-03G absolute PL quantum yield measurement system.

**ZrBDC gels.** Synthetic procedure represented by **ZrBDC-1:1-0.15** system. H<sub>2</sub>BDC (99.6 mg, 0.6 mmol) was dissolved in DMF (2.0 mL) and ZrCl<sub>4</sub> (140.0 mg, 0.6 mmol) was dissolved in EtOH (2.0 mL), and the two solutions were rapidly mixed together. The resulting homogeneous solution was then allowed to stand at 353 K for gelation in a closed container. A gel was obtained after 1.5 h. After gelation, the wet gel was aged for 1 d at 353 K.

Subsequently, the wet gel was subjected to solvent exchange with DMF for 12 h for 3 times, then the wet gel was subjected to solvent exchange with EtOH for 12 h for 3 times. The as-prepared gel was placed into a high-pressure Soxhlet extractor (0.75 L). The solvent in the wet gel was extracted with liquid CO<sub>2</sub> (265–270 g) for 24 h, and

the extraction temperature was maintained at 308 K. After depressurizing the stainless-steel autoclave slowly at room temperature for 2 h a white solid was obtained (175 mg).

**ZrBDC-TCPEx gels.** Synthetic procedure represented by **ZrBDC-TCPE0.01%** system. H<sub>2</sub>BDC (99.6 mg, 0.6 mmol) was dissolved in a solution of H<sub>2</sub>TCPE in DMF (2.0 mL,  $3.0 \times 10^{-5}$  mol L<sup>-1</sup>), ZrCl<sub>4</sub> (140.0 mg, 0.6 mmol) was dissolved in EtOH (2.0 mL), and the two solutions were rapidly mixed together. The resulting homogeneous solution was then allowed to stand at 353 K for gelation in a closed container. A gel was obtained after 4 h. After gelation, the wet gel was aged for 1 d at 353 K. After drying, a white solid was obtained (176 mg).

**ZrTCPE gel.** A solution of H<sub>4</sub>TCPE (38.1 mg, 0.075 mmol) in DMF (0.5 mL), and a solution of ZrCl<sub>4</sub> (35.0 mg, 0.15 mmol) in EtOH (0.5 mL) was mixed and the resulting homogeneous solution was allowed to stand at 353 K for gelation in a closed container. A camel gel was obtained after 5 h.

**Fluorescence experiments.** **ZrBDC-TCPE0.01%** wet gel was dispersed in 100 mL of H<sub>2</sub>O by ultrasonic to obtain a dispersion (10 g L<sup>-1</sup>, mass was determined after the gel was dried under vacuum). The fluorescence response was monitored upon excitation after incremental addition of analyte solutions (0.1 mM). *Caution! PA are highly explosive and should be handled carefully and in small amounts.* Analyte (0-400  $\mu$ L, 0.1 mM stock solution) was added to the dispersion of **ZrBDC-TCPE0.01%**

and fluorescent intensity was recorded. By plotting fluorescence intensity with increasing concentration of analyte, slope of graph ( $m$ ) was calculated. The standard deviation ( $\sigma$ ) was calculated from eleven blank measurements of **ZrBDC-TCPE0.01%** gel dispersion. The detection limit was calculated based on the fluorescence titration and calculated with the equation  $LOD = 3\sigma/m$ .

**Table S1** Gelation test of ZrCl<sub>4</sub> and H<sub>2</sub>BDC ( $T = 80$  °C, solvent EtOH:DMF =1:1).

| sample                | L                  | Zr:L | $c(L)/\text{mol L}^{-1}$ | Result            | Time/h |
|-----------------------|--------------------|------|--------------------------|-------------------|--------|
| <b>ZrBDC-1:1-0.15</b> | H <sub>2</sub> BDC | 1:1  | 0.15                     | white opaque gel  | 1.5    |
| <b>ZrBDC-3:2-0.15</b> | H <sub>2</sub> BDC | 3:2  | 0.15                     | white opaque gel  | 1.5    |
| <b>ZrBDC-2:1-0.15</b> | H <sub>2</sub> BDC | 2:1  | 0.15                     | white opaque gel  | 1      |
| <b>ZrBDC-1:2-0.15</b> | H <sub>2</sub> BDC | 1:2  | 0.15                     | white precipitate |        |
| <b>ZrBDC-2:3-0.15</b> | H <sub>2</sub> BDC | 2:3  | 0.15                     | white precipitate |        |
| <b>ZrBDC-1:1-0.2</b>  | H <sub>2</sub> BDC | 1:1  | 0.2                      | white opaque gel  | 1.5    |

**Table S2** Porosity properties of **ZrBDC-1:1-0.15** and **ZrBDC-TCPE<sub>x</sub>** ( $x = 0.01, 0.1, 1, 10\%$ ).

| Sample                              | $S_{\text{BET}}^{\text{a)}}$ /m <sup>2</sup> g <sup>-1</sup> | $V_{\text{t}}^{\text{b)}}$ /cm <sup>3</sup> g <sup>-1</sup> | $V_{\text{micro}}^{\text{c)}}$ /cm <sup>3</sup> g <sup>-1</sup> | $V_{\text{meso}}^{\text{d)}}$ /cm <sup>3</sup> g <sup>-1</sup> |
|-------------------------------------|--------------------------------------------------------------|-------------------------------------------------------------|-----------------------------------------------------------------|----------------------------------------------------------------|
| <b>ZrBDC-1:1-0.15</b>               | 1236                                                         | 0.929                                                       | 0.439                                                           | 0.471                                                          |
| <b>ZrBDC-1:1-0.15<sup>e)</sup></b>  | 1140                                                         | 1.107                                                       | 0.669                                                           | 0.471                                                          |
| <b>ZrBDC-TCPE0.01%</b>              | 1145                                                         | 0.832                                                       | 0.409                                                           | 0.403                                                          |
| <b>ZrBDC-TCPE0.01%<sup>e)</sup></b> | 1280                                                         | 0.598                                                       | 0.437                                                           | 0.571                                                          |
| <b>ZrBDC-TCPE0.1%</b>               | 1213                                                         | 0.612                                                       | 0.435                                                           | 0.141                                                          |
| <b>ZrBDC-TCPE0.1%<sup>e)</sup></b>  | 1219                                                         | 0.806                                                       | 0.431                                                           | 0.335                                                          |
| <b>ZrBDC-TCPE1%</b>                 | 1044                                                         | 0.613                                                       | 0.374                                                           | 0.212                                                          |
| <b>ZrBDC-TCPE10%</b>                | 901                                                          | 0.682                                                       | 0.315                                                           | 0.340                                                          |

a)  $S_{\text{BET}}$  is BET specific surface area; b)  $V_{\text{t}}$  is the total specific pore volume; c)  $V_{\text{micro}}$  was calculated by SF method; d)  $V_{\text{meso}}$  was calculated by BJH method; e) Parallel samples.

**Table S3** Fluorescence lifetime data of **ZrBDC-TCPE<sub>x</sub>** ( $x = 0.01, 0.1, 1, 10\%$ ), **ZrBDC-1:1-0.15**, and **ZrTCPE** gels dispersed in water (10 g L<sup>-1</sup>).

| Sample <sup>a)</sup>   | $\tau_1^{\text{b)}}$ /ns | $A_1^{\text{c)}}$ | $\tau_2^{\text{b)}}$ /ns | $A_2^{\text{c)}}$ | $\langle \tau \rangle^{\text{d)}}$ /ns | $\Phi^{\text{e)}}$ |
|------------------------|--------------------------|-------------------|--------------------------|-------------------|----------------------------------------|--------------------|
| <b>ZrBDC-TCPE0.01%</b> | 2.13                     | 0.44              | 4.25                     | 0.56              | 3.32                                   | 59%                |
| <b>ZrBDC-TCPE0.1%</b>  | 3.87                     | 0.96              | 11.45                    | 0.04              | 4.17                                   | 57%                |
| <b>ZrBDC-TCPE1%</b>    | 2.35                     | 0.30              | 4.54                     | 0.70              | 3.87                                   | 76%                |
| <b>ZrBDC-TCPE10%</b>   | 0.03                     | 0.11              | 4.48                     | 0.89              | 3.98                                   | 80%                |
| <b>ZrBDC-1:1-0.15</b>  | 0.52                     | 0.70              | 5.83                     | 0.30              | 2.11                                   | 14%                |
| <b>ZrTCPE</b>          | 1.90                     | 0.36              | 5.34                     | 0.64              | 4.12                                   | 86%                |

a) The resulting signals were fitted with a double exponential decay function, which obtained the best fit with respect to both the recorded phase and intensity information; b) Fluorescence lifetime; c) Fractional contribution; d) Weighted mean lifetime was calculated using the equation  $\langle \tau \rangle = (A_1 \tau_1 + A_2 \tau_2)/(A_1 + A_2)$ ; e) Absolute fluorescence quantum yield was obtained for the wet gel with solvent exchanged with ethanol.

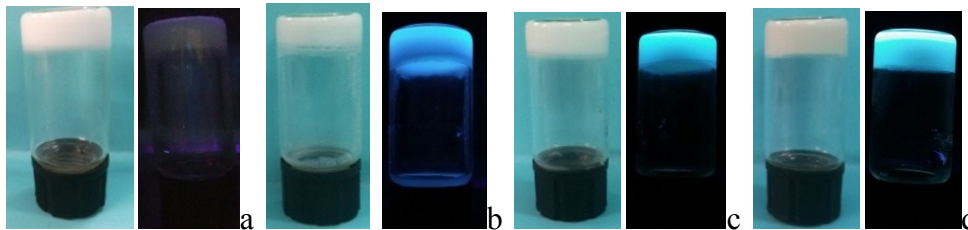

**Fig. S1** Photographs of (from left to right) **ZrBDC-1:1-0.15**, **ZrBDC-TCPE0.01%**, **ZrBDC-TCPE0.1%**, **ZrBDC-TCPE1%** and **ZrBDC-TCPE10%** wet gels taken under day light and under irradiation with 365 nm UV light.

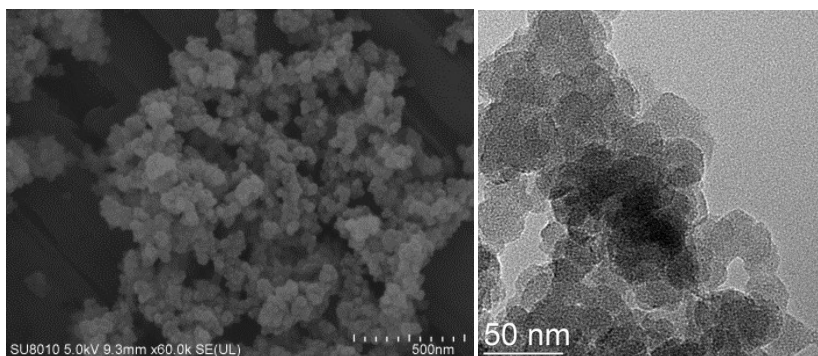

**Fig. S2** SEM (left) and TEM (right) images of **ZrBDC-TCPE0.1%**.

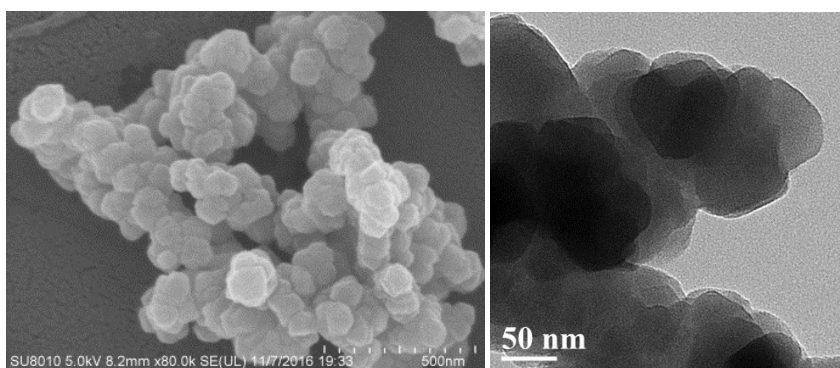

**Fig. S3** SEM (left) and TEM (right) images of **ZrBDC-TCPE1%**.

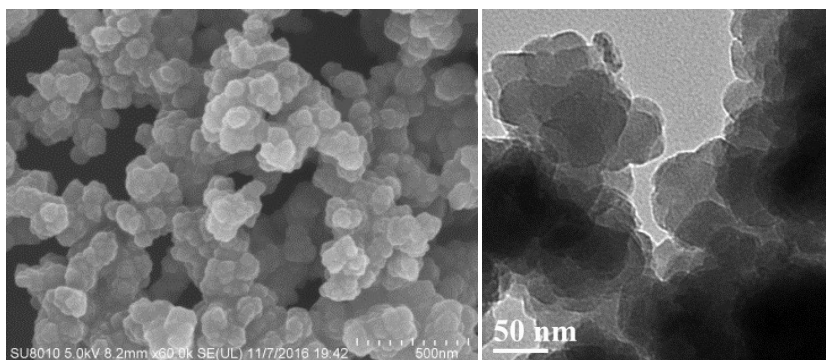

**Fig. S4** SEM (left) and TEM (right) images of **ZrBDC-TCPE10%**.

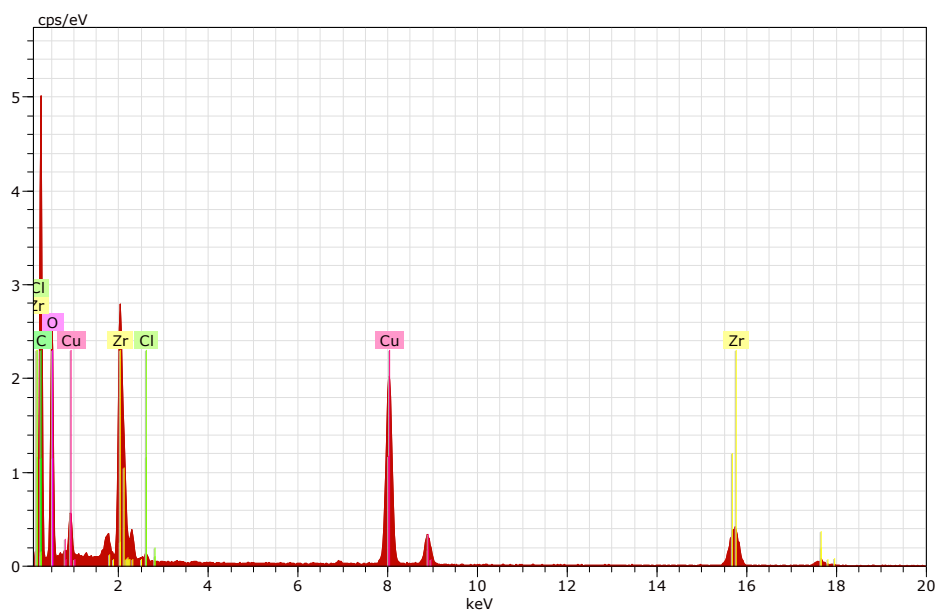

**Fig. S5** EDX spectrum of **ZrBDC-1:1-0.15** (mounted on a carbon coated copper grid) showing atomic composition of Zr 6.42 and Cl 0.22%.

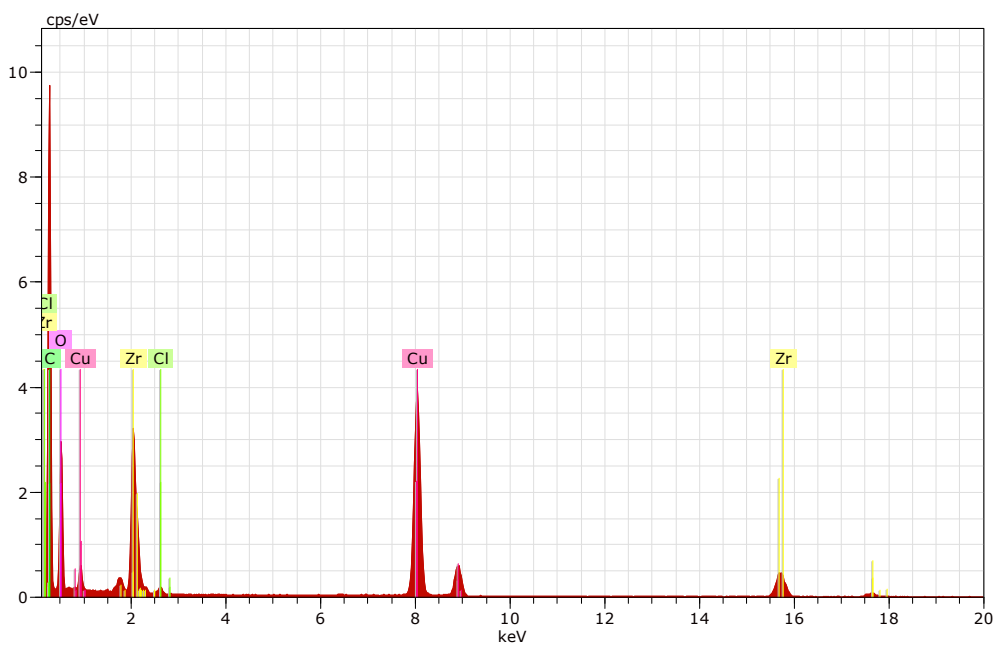

**Fig. S6** EDX of **ZrBDC-TCPE0.01%** wet gel (mounted on a carbon coated copper grid) showing atomic composition of Zr 3.97 and Cl 0.20%.

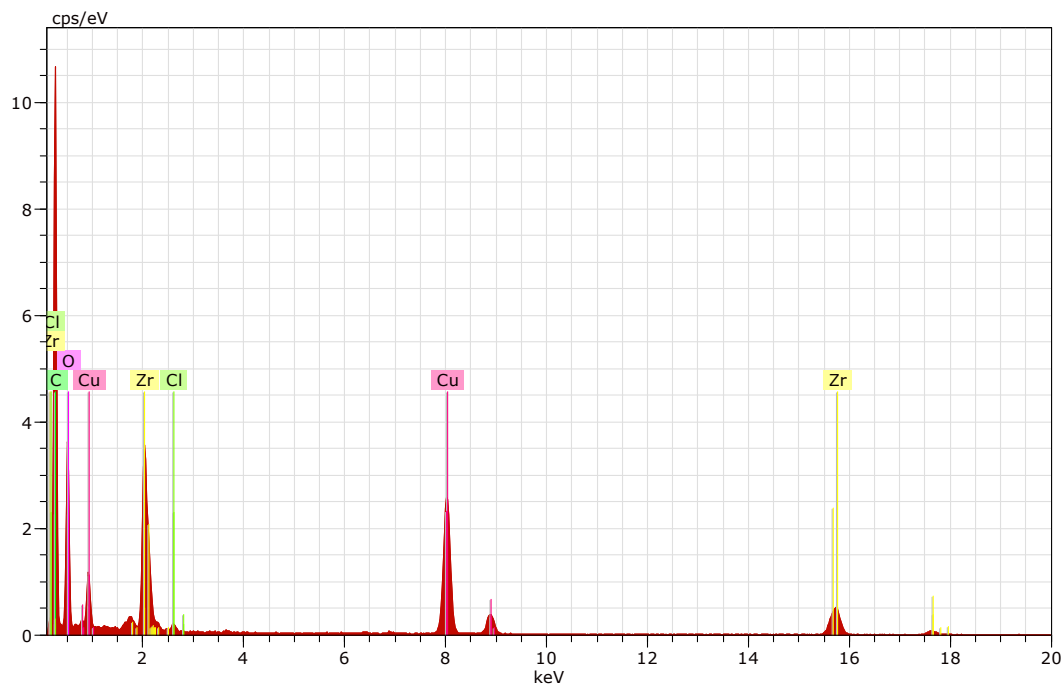

**Fig. S7** EDX of ZrBDC-TCPE0.1% wet gel (mounted on a carbon coated copper grid) showing atomic composition of Zr 4.28 and Cl 0.18%.

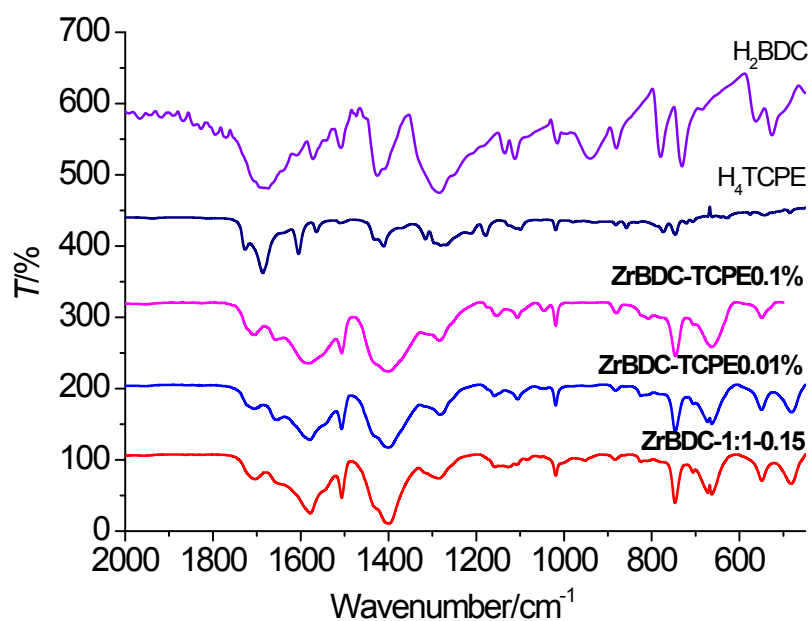

**Fig. S8** FT-IR spectra of ZrBDC-1:1-0.15, ZrBDC-TCPE0.01%, ZrBDC-TCPE0.1%, 1,4-benzenedicarboxylic acid and tetrakis(4-carboxyphenyl)ethylene.



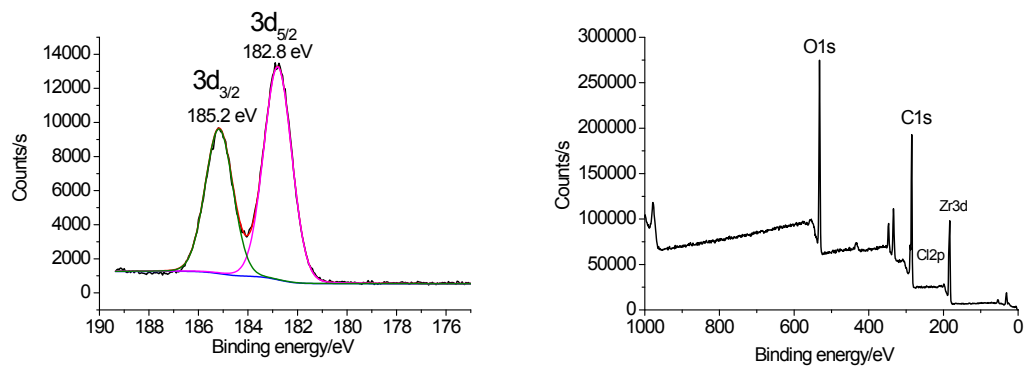

**Fig. S9** Zr 3d core level spectrum (left) and XPS survey (right) of **ZrBDC-1:1-0.15**.

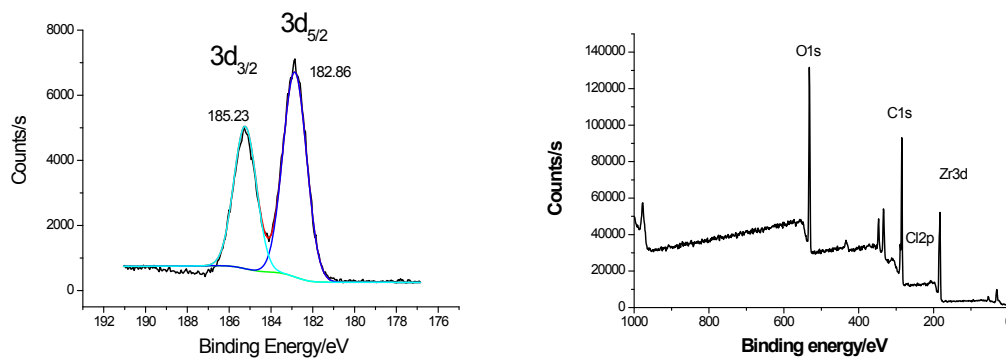

**Fig. S10** Zr 3d core level spectrum (left) and XPS survey (right) of **ZrBDC-TCPE0.01%**.

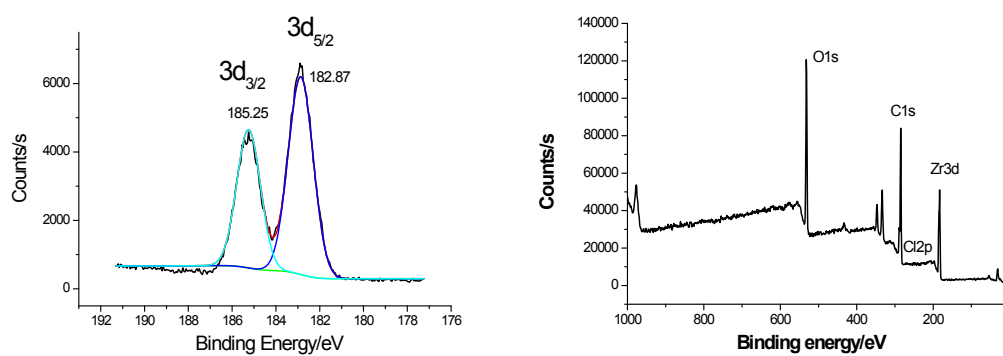

**Fig. S11** Zr 3d core level spectrum (left) and XPS survey (right) of **ZrBDC-TCPE0.1%**.

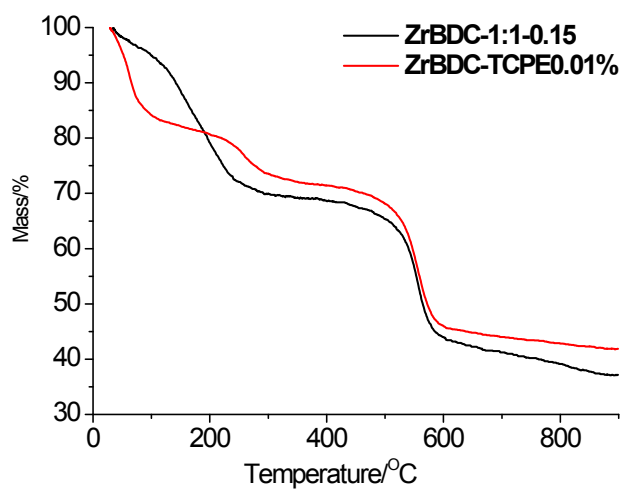

**Fig. S12** TG curve of **ZrBDC-1:1-0.15** and **ZrBDC-TCPE0.01%**.

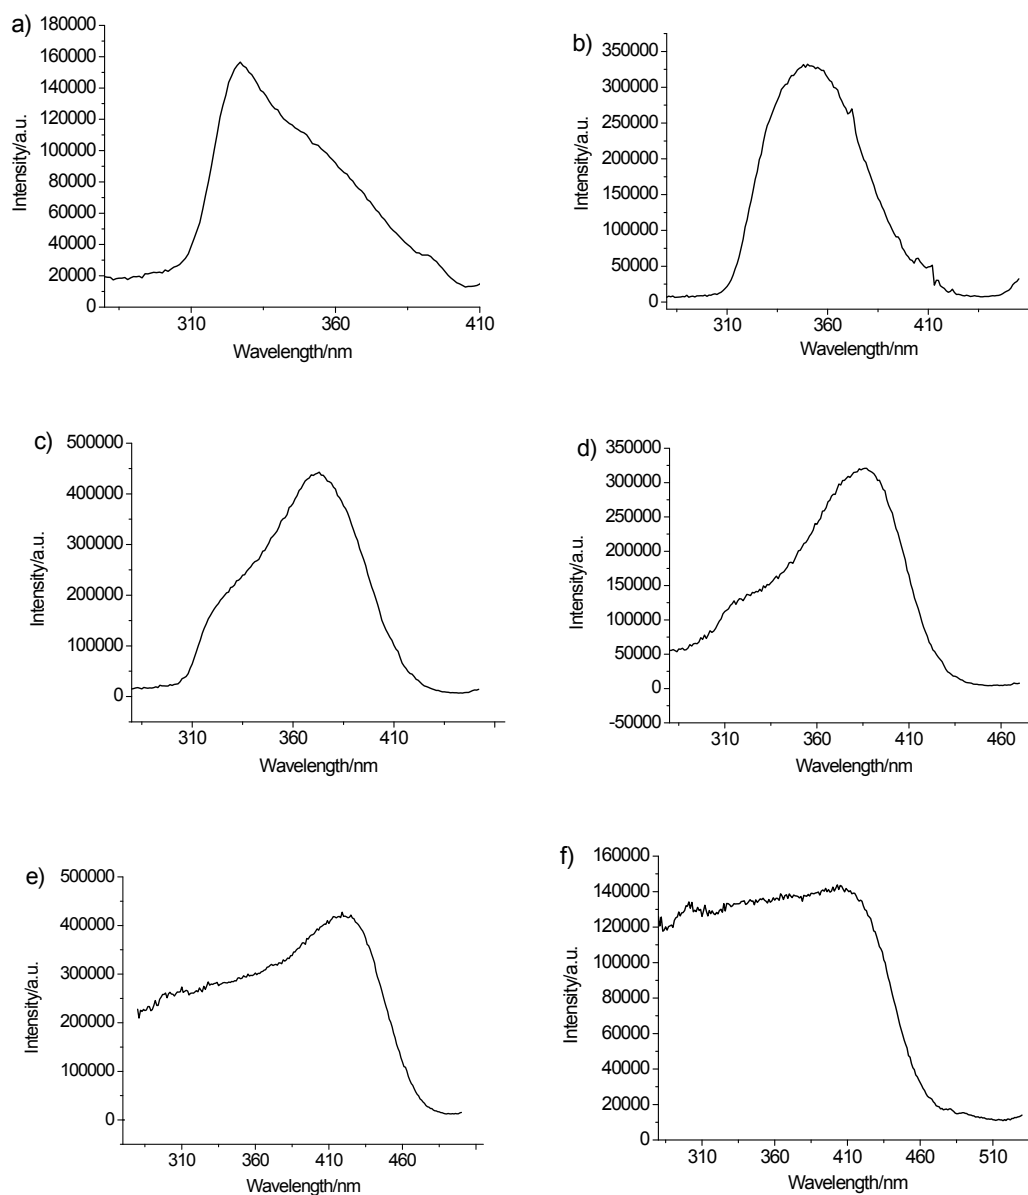

**Fig. S13** Excitation spectra of a) ZrBDC-1:1-0.15 (λ<sub>em</sub> = 398 nm), b) ZrBDC-TCPE0.01% (λ<sub>em</sub> = 461 nm), c) ZrBDC-TCPE0.1% (λ<sub>em</sub> = 468 nm), d) ZrBDC-TCPE1% (λ<sub>em</sub> = 477 nm), e) ZrBDC-TCPE10% (λ<sub>em</sub> = 521 nm) and f) ZrTCPE (λ<sub>em</sub> = 540 nm) gels dispersed in water (10 g L<sup>-1</sup>).

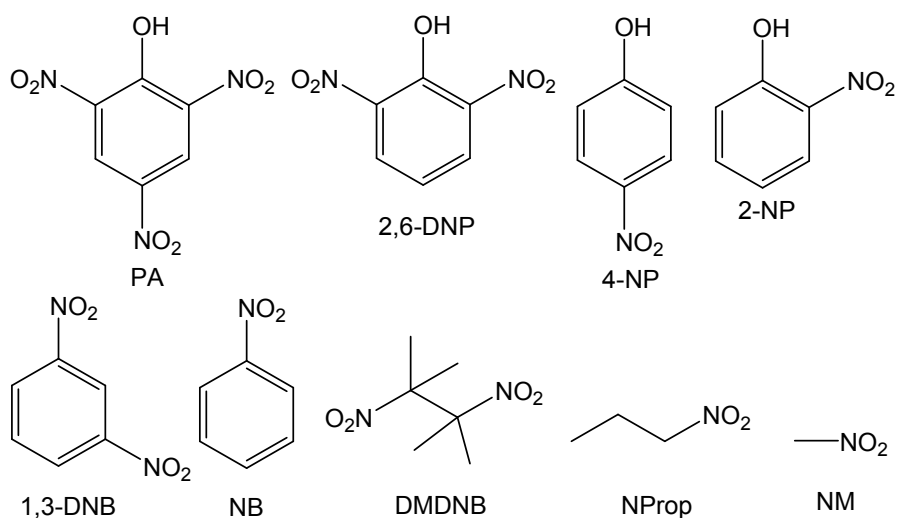

**Scheme S1.** Nitroaromatic compounds tested for fluorescence quenching titrations.

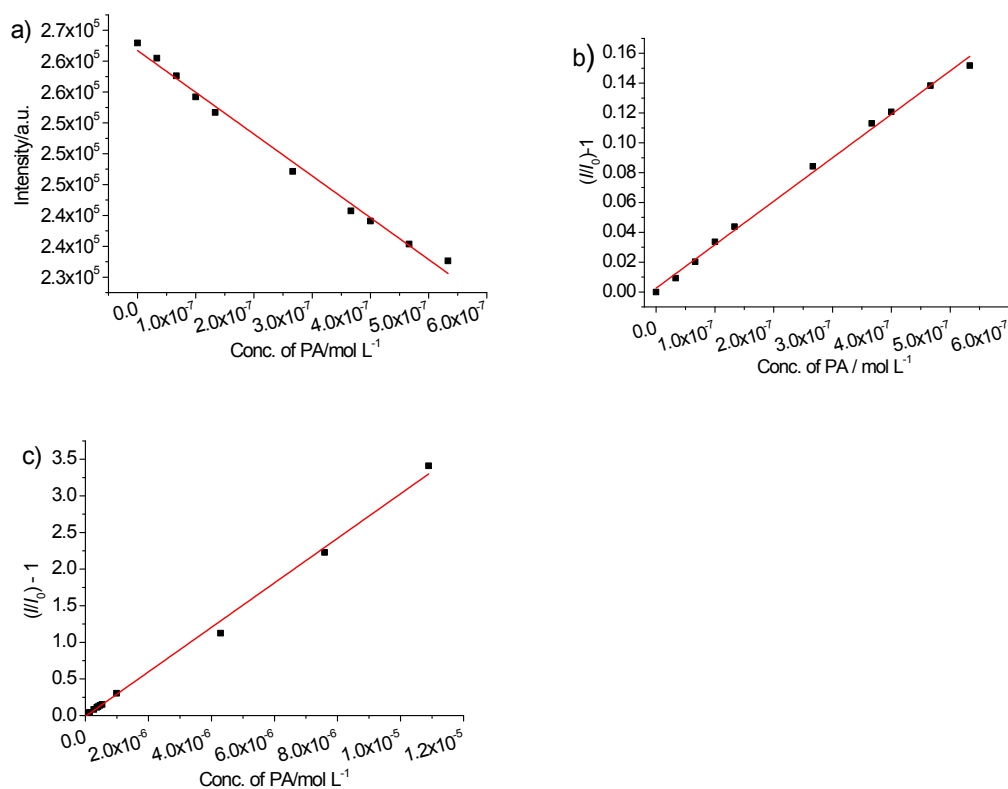

**Fig. S14** Linear region of fluorescence intensity of **ZrBDC-TCPE0.01%** gel ( $10 \text{ g L}^{-1}$ ) dispersed in water upon addition of PA aqueous solution ( $\lambda_{\text{ex}} = 363 \text{ nm}$ ) ( $R^2 = 0.9912$ ). b) Stern-Volmer traces of PA ( $0.1 \text{ mmol L}^{-1}$ ) in water dispersion of **ZrBDC-TCPE0.01%** ( $10 \text{ g L}^{-1}$ ) ( $R^2 = 0.9962$ ) ( $0 - 0.53 \text{ } \mu\text{mol L}^{-1}$ ) with  $K_{\text{SV}} = 2.91 \times 10^5 \text{ L mol}^{-1}$ . c) Stern-Volmer traces of PA ( $0.1 \text{ mmol L}^{-1}$ ) in water dispersion of **ZrBDC-TCPE0.01%** gel ( $10 \text{ g L}^{-1}$ ) ( $R^2 = 0.9963$ ) ( $0 - 10.09 \text{ } \mu\text{mol L}^{-1}$ ) with  $K_{\text{SV}} = 3.04 \times 10^5 \text{ L mol}^{-1}$ .

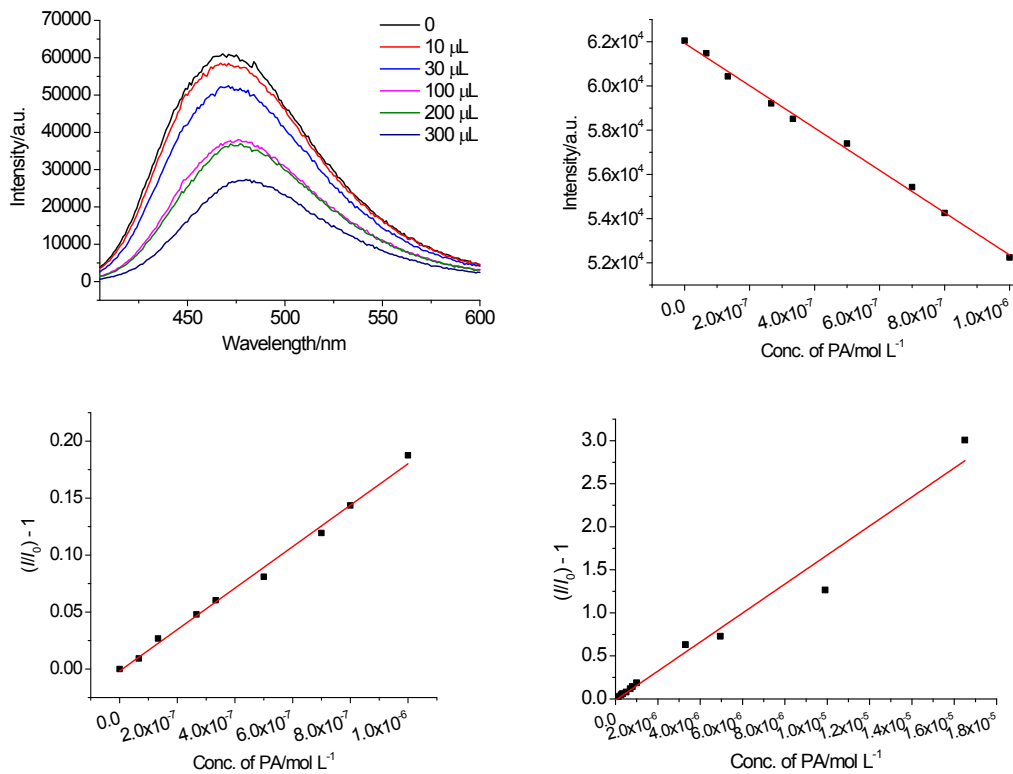

**Fig. S15** a) Fluorescence spectra of **ZrBDC-TCPE0.1%** gel dispersed in water (10 g L<sup>-1</sup>) upon incremental addition of an aqueous solution of PA (0.1 mmol L<sup>-1</sup>) ( $\lambda_{\text{ex}} = 383$  nm). b) Linear region of fluorescence intensity of **ZrBDC-TCPE0.1%** gel dispersed in water (10 g L<sup>-1</sup>) upon addition of PA solution ( $R^2 = 0.9963$ ). c) Stern-Volmer traces of PA (0.1 mmol L<sup>-1</sup>) in water dispersion of **ZrBDC-TCPE0.1%** gel (10 g L<sup>-1</sup>) ( $R^2 = 0.9935$ ) (0 – 1  $\mu\text{mol L}^{-1}$ ) with  $K_{\text{SV}} = 1.82 \times 10^5$  L mol<sup>-1</sup>. d) Stern-Volmer traces of PA (0.1 mmol L<sup>-1</sup>) in water suspension of **ZrBDC-TCPE0.1%** gel (10 g L<sup>-1</sup>) ( $R^2 = 0.9710$ ) (0 – 16.5  $\mu\text{mol L}^{-1}$ ) with  $K_{\text{SV}} = 1.69 \times 10^5$  L mol<sup>-1</sup>.

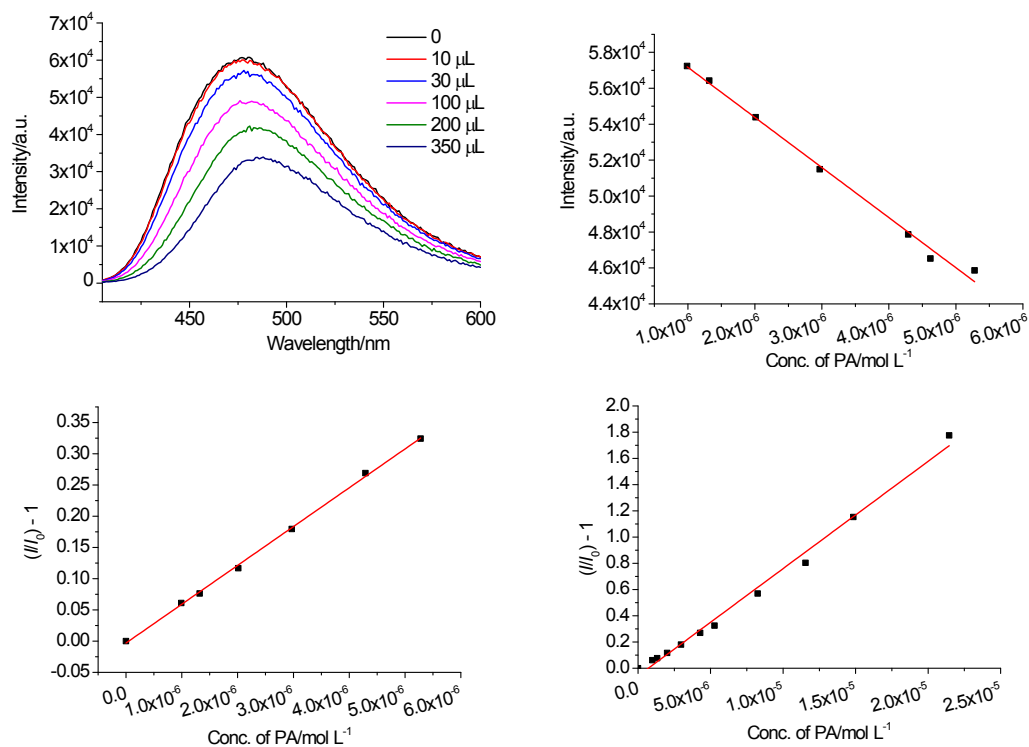

**Fig. S16** a) Fluorescence spectra of **ZrBDC-TCPE1%** gel dispersed in water (10 g L<sup>-1</sup>) upon incremental addition of an aqueous solution of PA (0.1 mmol L<sup>-1</sup>) ( $\lambda_{\text{ex}} = 393$  nm). b) Linear region of fluorescence intensity of **ZrBDC-TCPE1%** gel (10 g L<sup>-1</sup>) dispersed in water upon addition of PA solution ( $R^2 = 0.9931$ ). c) Stern-Volmer traces of PA (0.1 mmol L<sup>-1</sup>) in water dispersion of **Zr-BDC-TCPE1%** gel (10 g L<sup>-1</sup>) ( $R^2 = 0.9988$ ) (0 - 5.28  $\mu\text{mol L}^{-1}$ ) with  $K_{\text{SV}} = 6.22 \times 10^4$  L mol<sup>-1</sup>. d) Stern-Volmer traces of PA (0.1 mmol L<sup>-1</sup>) in water dispersion of **Zr-BDC-TCPE1%** gel (10 g L<sup>-1</sup>) ( $R^2 = 0.9914$ ) (0 - 21.45  $\mu\text{mol L}^{-1}$ ) with  $K_{\text{SV}} = 8.18 \times 10^4$  L mol<sup>-1</sup>.

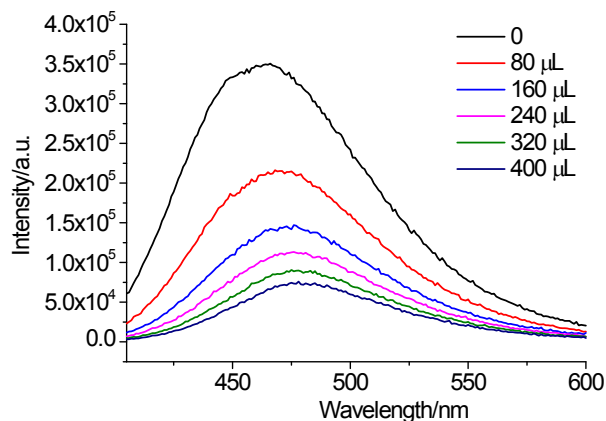

**Fig. S17** Emission spectra of **ZrBDC-TCPE0.01%** gel dispersed in water (10 g L<sup>-1</sup>) upon incremental addition of PA aqueous solution (0.1 mmol L<sup>-1</sup>) ( $\lambda_{\text{ex}} = 363$  nm).

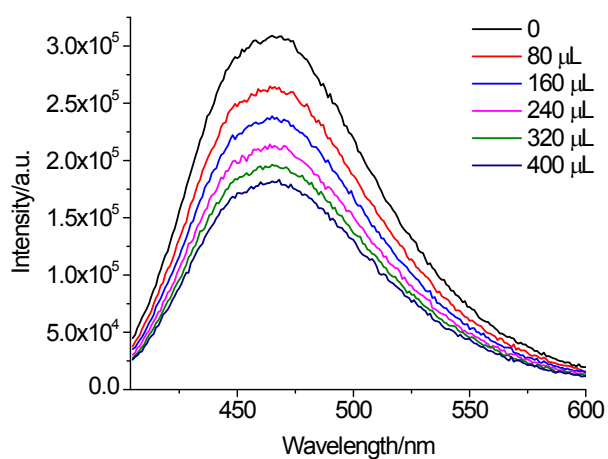

**Fig. S18** Emission spectra of **ZrBDC-TCPE0.01%** gel dispersed in water ( $10 \text{ g L}^{-1}$ ) upon incremental addition of 2,6-DNT aqueous solution ( $0.1 \text{ mmol L}^{-1}$ ) ( $\lambda_{\text{ex}} = 363 \text{ nm}$ ).

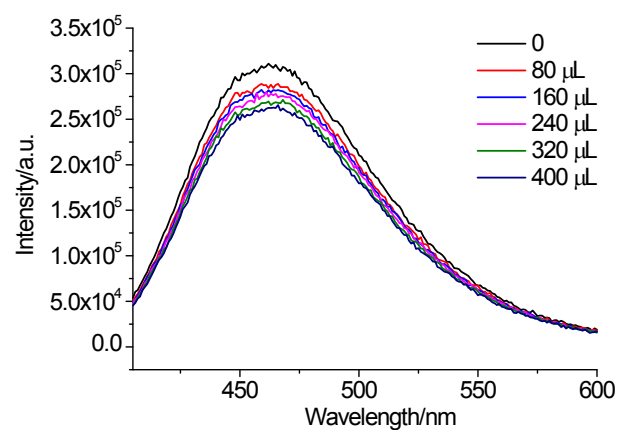

**Fig. S19** Emission spectra of **ZrBDC-TCPE0.01%** gel dispersed in water ( $10 \text{ g L}^{-1}$ ) upon incremental addition of 1,3-DNB aqueous solution ( $0.1 \text{ mmol L}^{-1}$ ) ( $\lambda_{\text{ex}} = 363 \text{ nm}$ ).

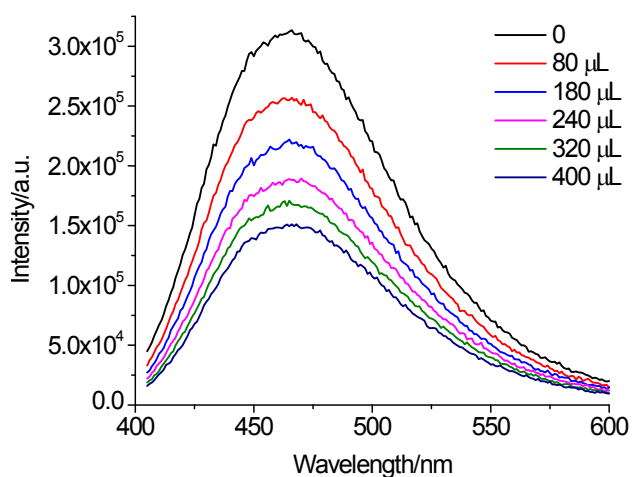

**Fig. S20** Emission spectra of **ZrBDC-TCPE0.01%** gel dispersed in water (10 g L<sup>-1</sup>) upon incremental addition of 4-NP aqueous solution (0.1 mmol L<sup>-1</sup>) ( $\lambda_{\text{ex}} = 363$  nm).

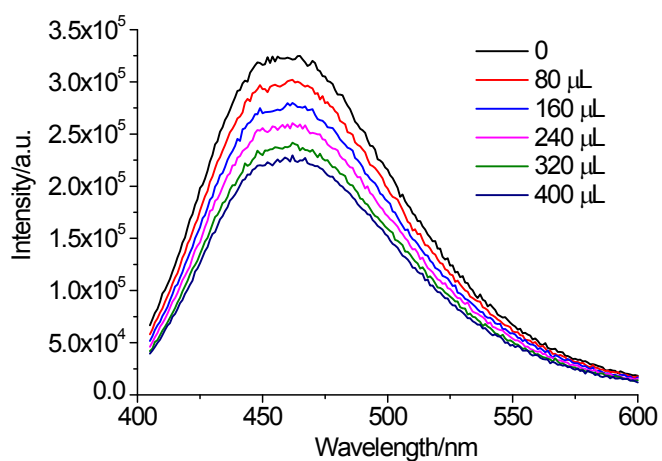

**Fig. S21** Emission spectra of **ZrBDC-TCPE0.01%** gel dispersed in water (10 g L<sup>-1</sup>) upon incremental addition of 2-NP aqueous solution (0.1 mmol L<sup>-1</sup>) ( $\lambda_{\text{ex}} = 363$  nm).



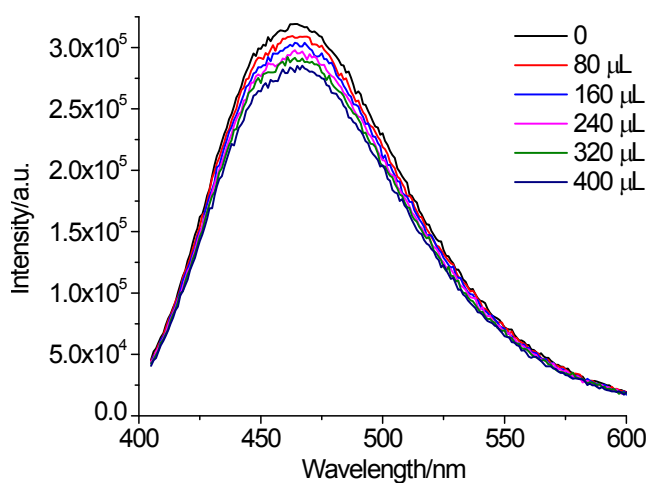

**Fig. S22** Emission spectra of ZrBDC-TCPE0.01% gel dispersed in water ( $10 \text{ g L}^{-1}$ ) upon incremental addition of DMDNB aqueous solution ( $0.1 \text{ mM}$ ) ( $\lambda_{\text{ex}} = 363 \text{ nm}$ ).

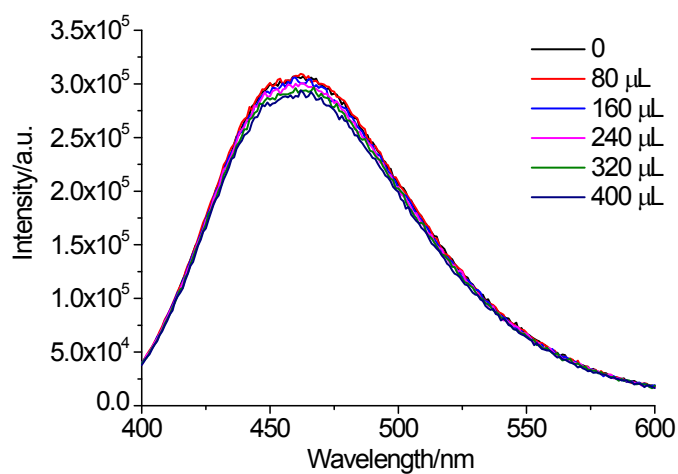

**Fig. S23** Emission spectra of ZrBDC-TCPE0.01% gel dispersed in water ( $10 \text{ g L}^{-1}$ ) upon incremental addition of NProp aqueous solution ( $0.1 \text{ mmol L}^{-1}$ ) ( $\lambda_{\text{ex}} = 363 \text{ nm}$ ).

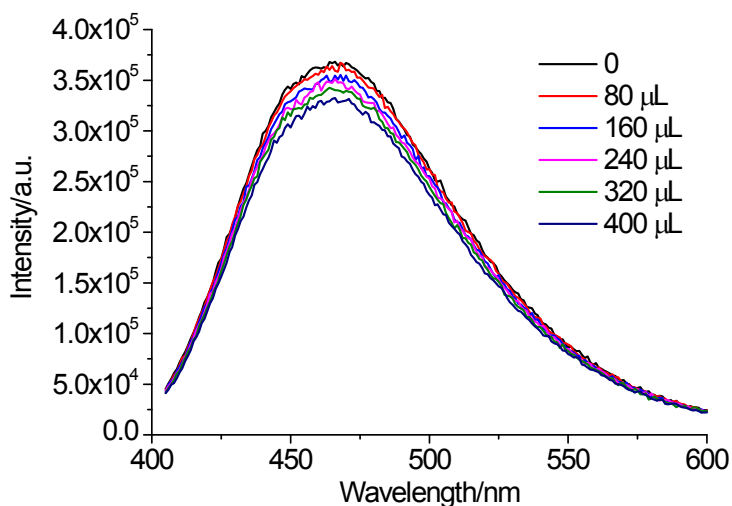

**Fig. S24** Emission spectra of ZrBDC-TCPE0.01% gel dispersed in water (10 g L<sup>-1</sup>) upon incremental addition of NB aqueous solution (0.1 mmol L<sup>-1</sup>) (λ<sub>ex</sub> = 363 nm).

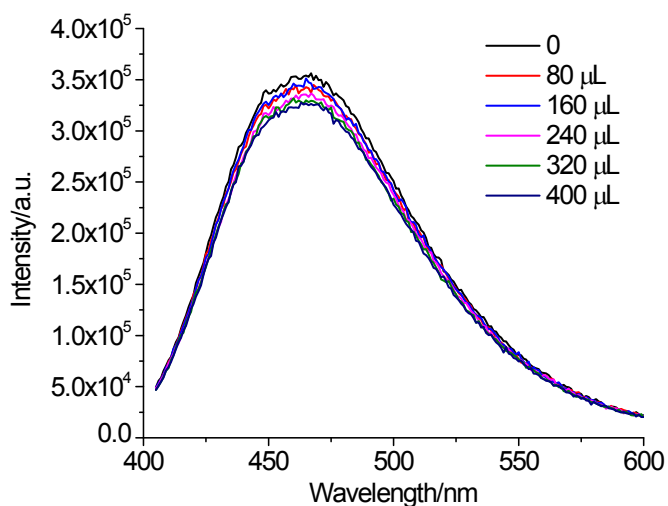

**Fig. 25** Emission spectra of ZrBDC-TCPE0.01% gel dispersed in water (10 g L<sup>-1</sup>) upon incremental addition of NM aqueous solution (0.1 mmol L<sup>-1</sup>) (λ<sub>ex</sub> = 363 nm).

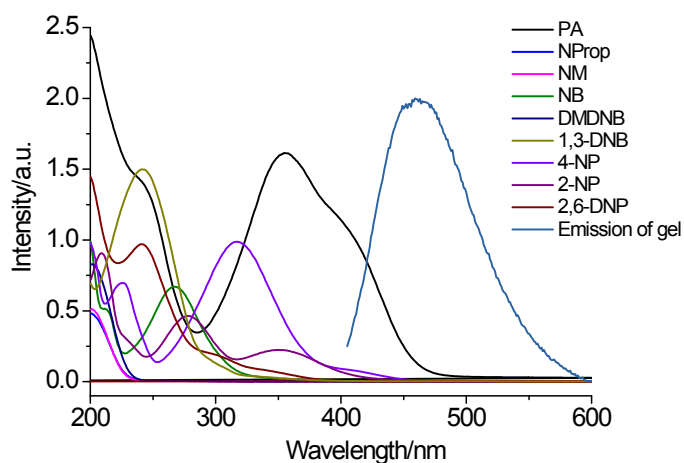

**Fig. S26** Spectral overlap between the UV-vis adsorption spectra of analytes ( $0.1 \text{ mmol L}^{-1}$ ) in aqueous solutions and the emission spectrum of **ZrBDC-TCPE0.01%** gel dispersed in water ( $10 \text{ g L}^{-1}$ ).

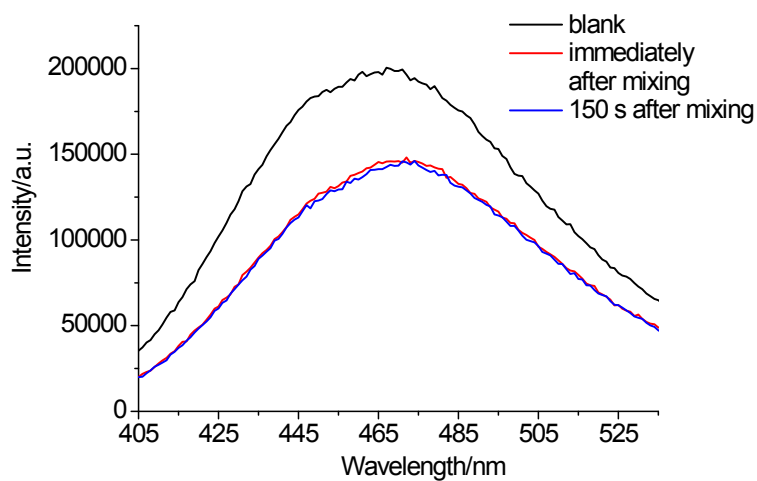

**Fig. S27** The fluorescent spectra of quenching efficiency vs. exposure time, blank dispersion of **ZrBDC-TCPE0.01%**, collected immediately after mixing with  $80 \mu\text{L}$  of PA aqueous solution ( $0.1 \text{ mmol L}^{-1}$ ), collected 150 s after mixing.
